# Supplementary material for: Corrosion processes at the GGG40 steel–bentonite interface
Source: Copernicus journal article supplement (doi:10.5194/sand-2-45-2023), 2023-09-06
Supplement: Supplementary file 1 [file sand-2-45-2023-supplement.zip]

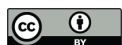

## *Supplement of*

# **Corrosion processes at the GGG40 steel–bentonite interface**

**Andrés G. Muñoz and Dieter Schild**

*Correspondence to:* Andrés G. Muñoz (andres.munoz@grs.de)

- sand-2-45-2023-supplement-title-page.pdf
- sand-2023-53\_One-Slide presentation-SafeND 2023\_MUN.pdf
- sand-2023-53\_Poster\_SafeND\_2023\_MUN.pdf

The copyright of individual parts of the supplement might differ from the article licence.
