# Supplementary material for: Corrosion processes at the GGG40 steel–bentonite interface
Source: Copernicus journal article supplement (doi:10.5194/sand-2-45-2023), 2023-09-06
Supplement: Supplementary file 3 [file sand-2-45-2023-supplement.zip]

Archive with 3 entries (3 files):
- sand-2023-53_One-Slide presentation-SafeND 2023_MUN.pdf
- sand-2-45-2023-supplement-title-page.pdf
- sand-2023-53_Poster_SafeND_2023_MUN.pdf
