# Supplementary material for: Corrosion processes at the GGG40 steel–bentonite interface
Source: Copernicus journal article supplement (doi:10.5194/sand-2-45-2023), 2023-09-06
Supplement: Supplementary file 3 [file sand-2-45-2023-supplement.zip › sand-2023-53_Poster_SafeND_2023_MUN.pdf]

# Corrosion processes at the GGG40 steel–bentonite interface

Andrés G. Muñoz<sup>1</sup>, Dieter Schild<sup>2</sup>

## Motivation

Spheroidal graphite cast iron (GGG40/0.7040) is a classical material, the outer wall containers for granite disposal concepts are made of. This work aims to provide a deeper insight into the corrosion mechanism acting at the interface steel-bentonite after saturation with aerated Opalinus clay water. The steel degradation was monitored by polarization and electrochemical impedance in middle-term experiments performed in an special bentonite three-electrodes electrochemical cell.

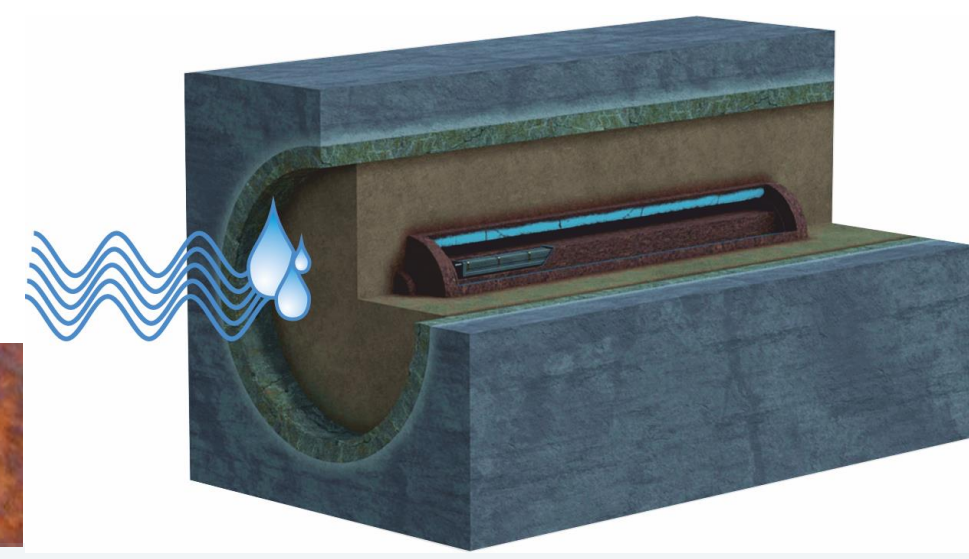

## Experimental

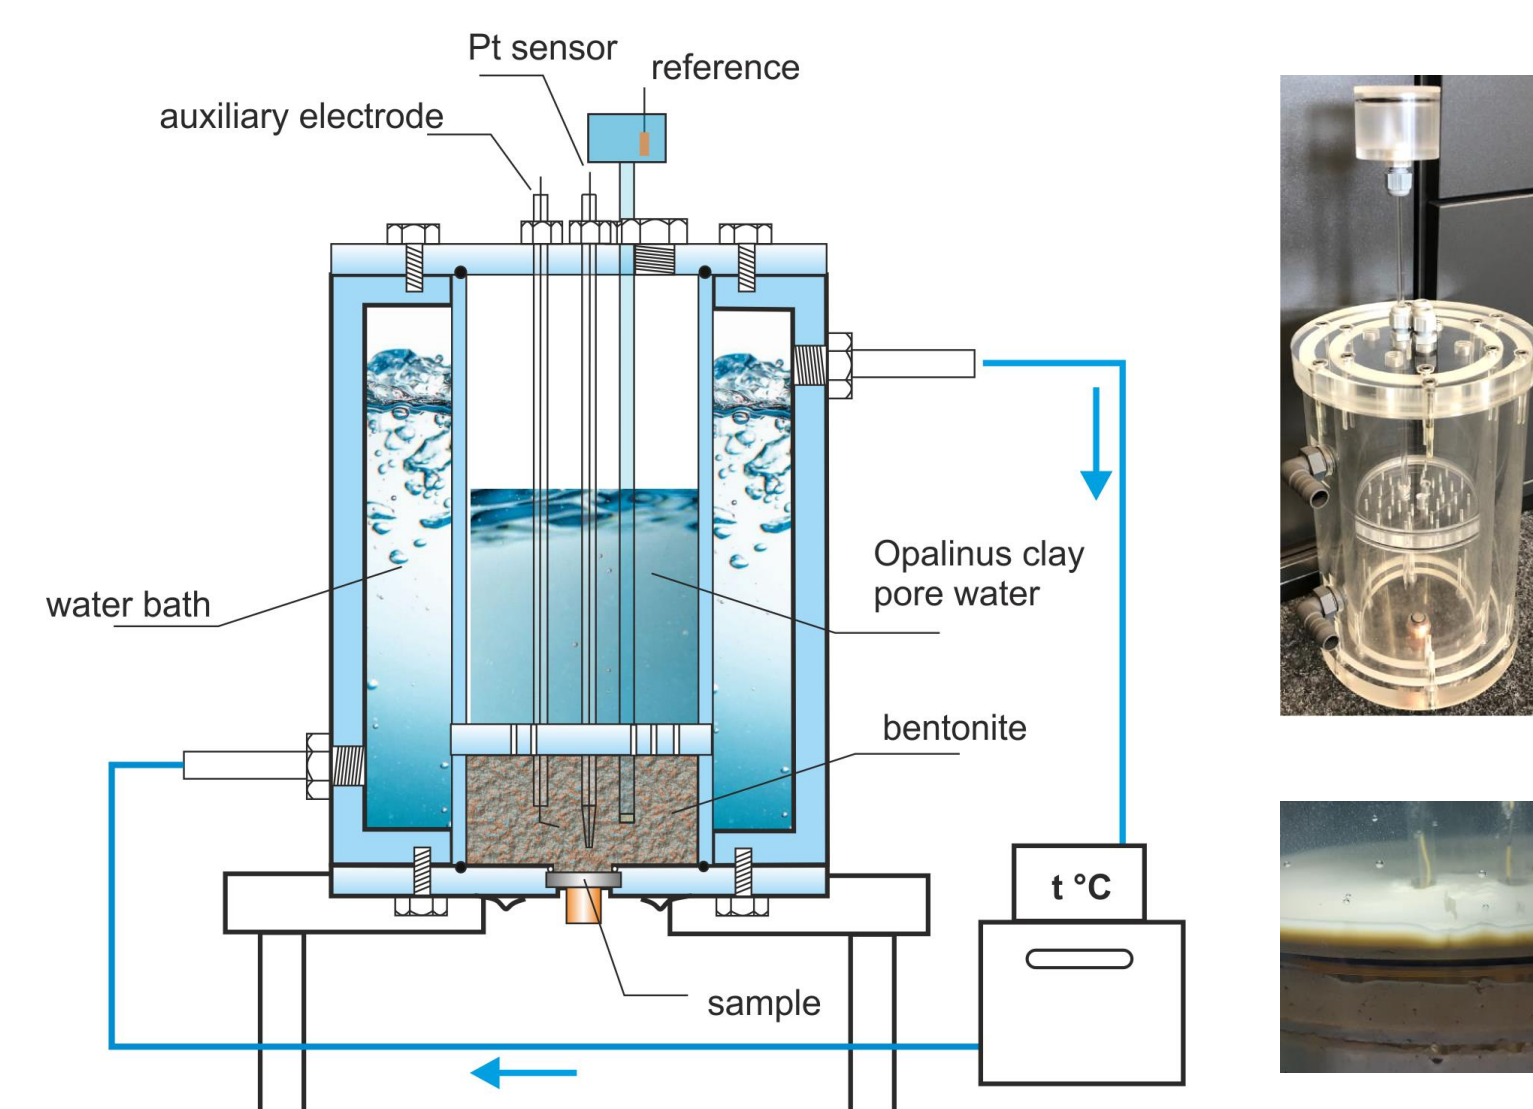

- Three-electrodes bentonite cell
- Slurry of Wyoming bentonite with Opalinus clay water (1:10)
- Initial oxygen content: 8.6 mg l<sup>-1</sup>
- Duration of experiment: 3 months
- Samples mirror polished: emery paper + diamond suspension 6 µm and 1 µm

## Electrochemical studies

The polarization curves are characterized by random oscillations showing an upper and a lower current limit. This is probably due to a coupling of the cathodic activity of the graphite nodules with the corroding steel matrix. The oxygen reduction is attenuated by diffusion-control and water reduction on the steel matrix dominates the dissolution process.

### Polarizations

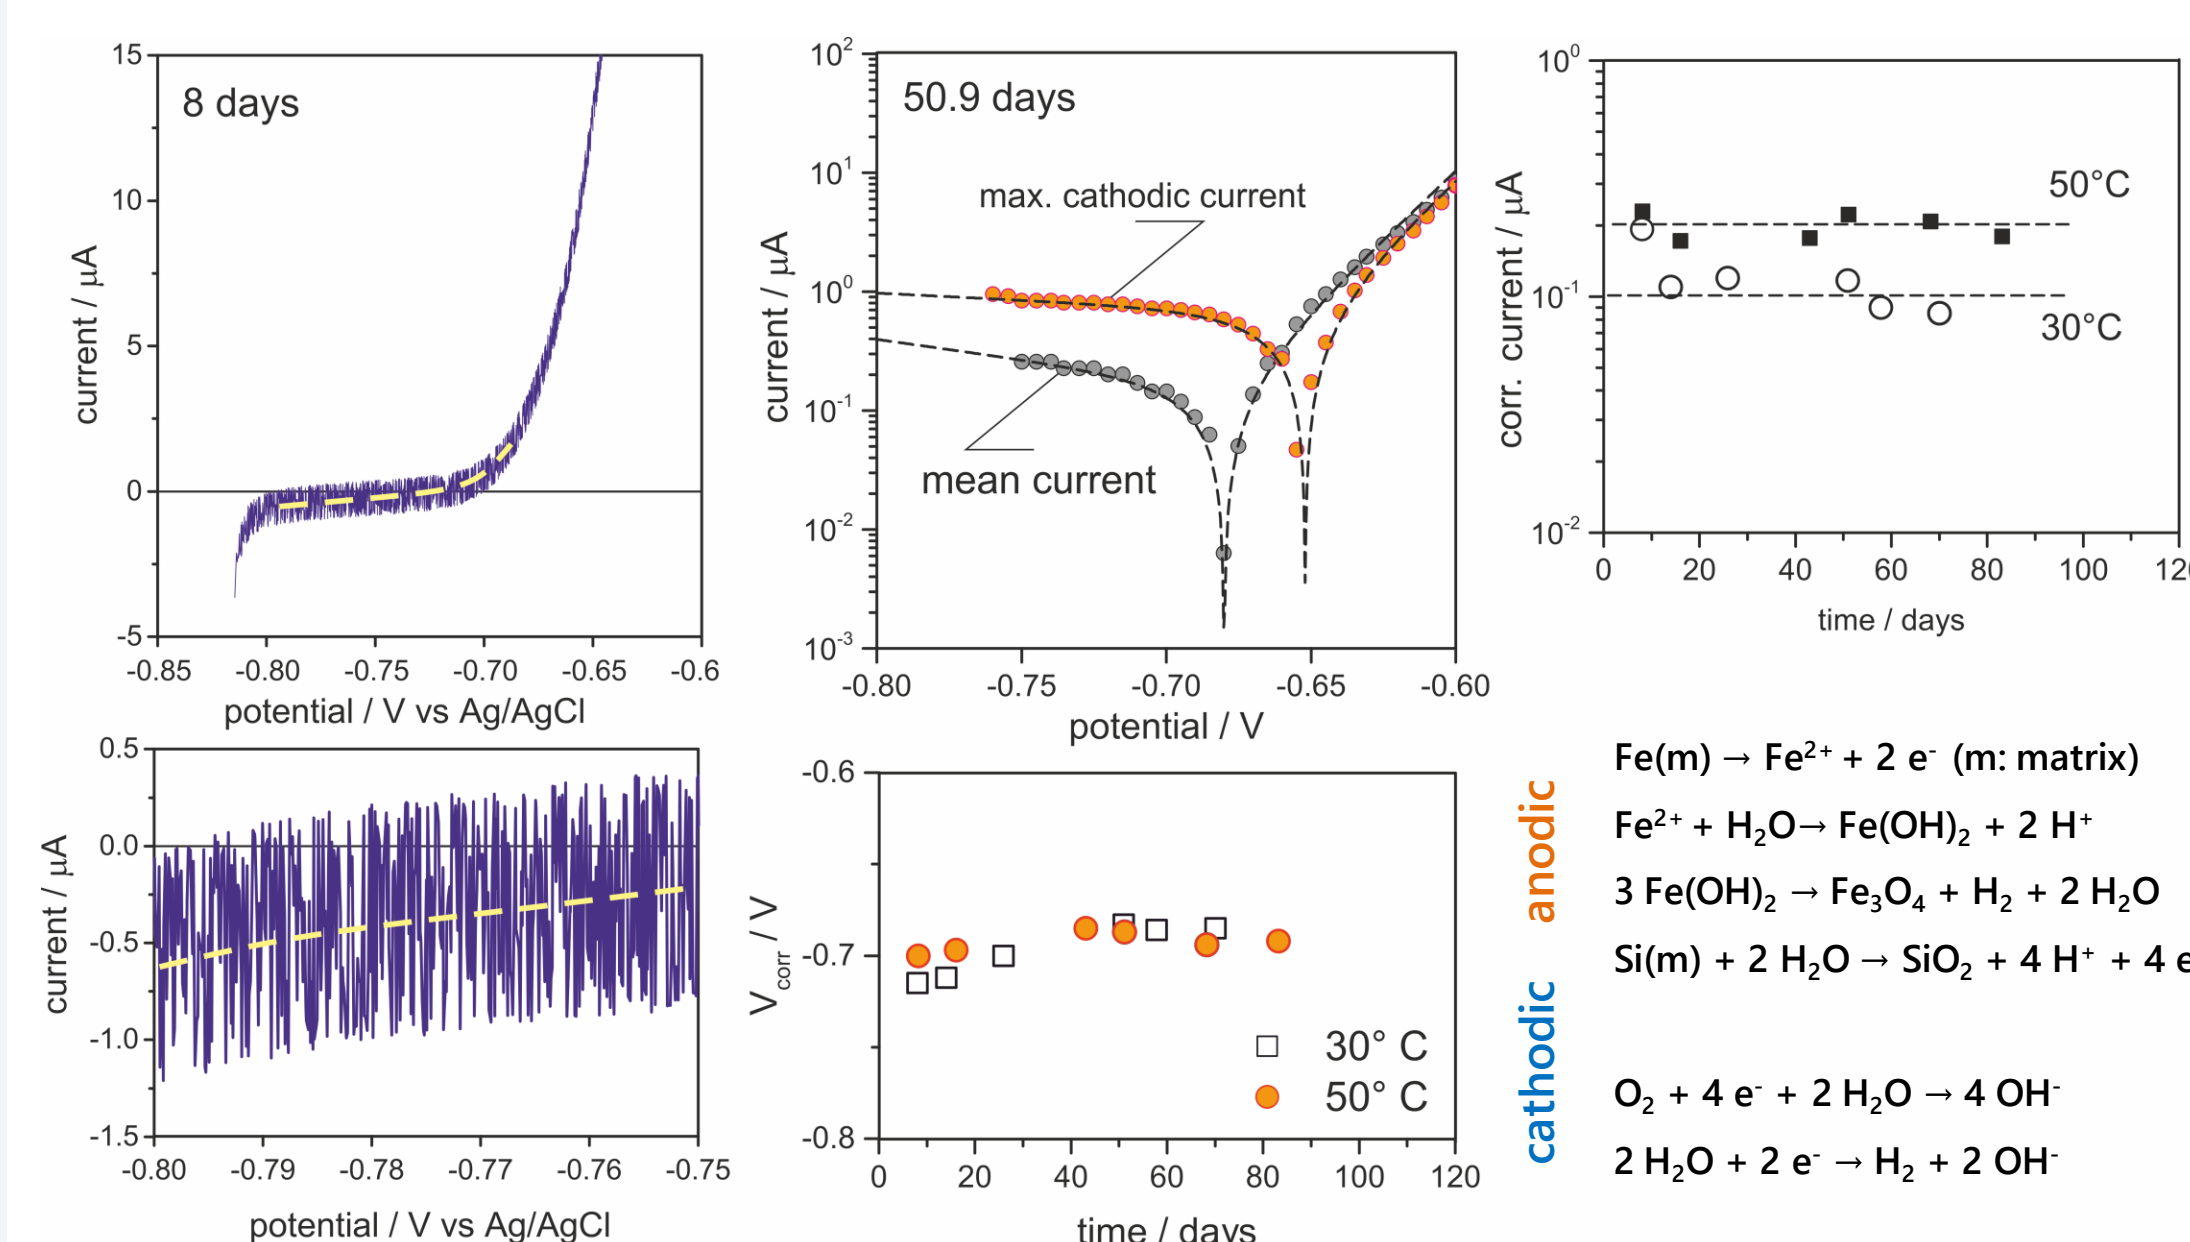

### Electrochem. Impedance

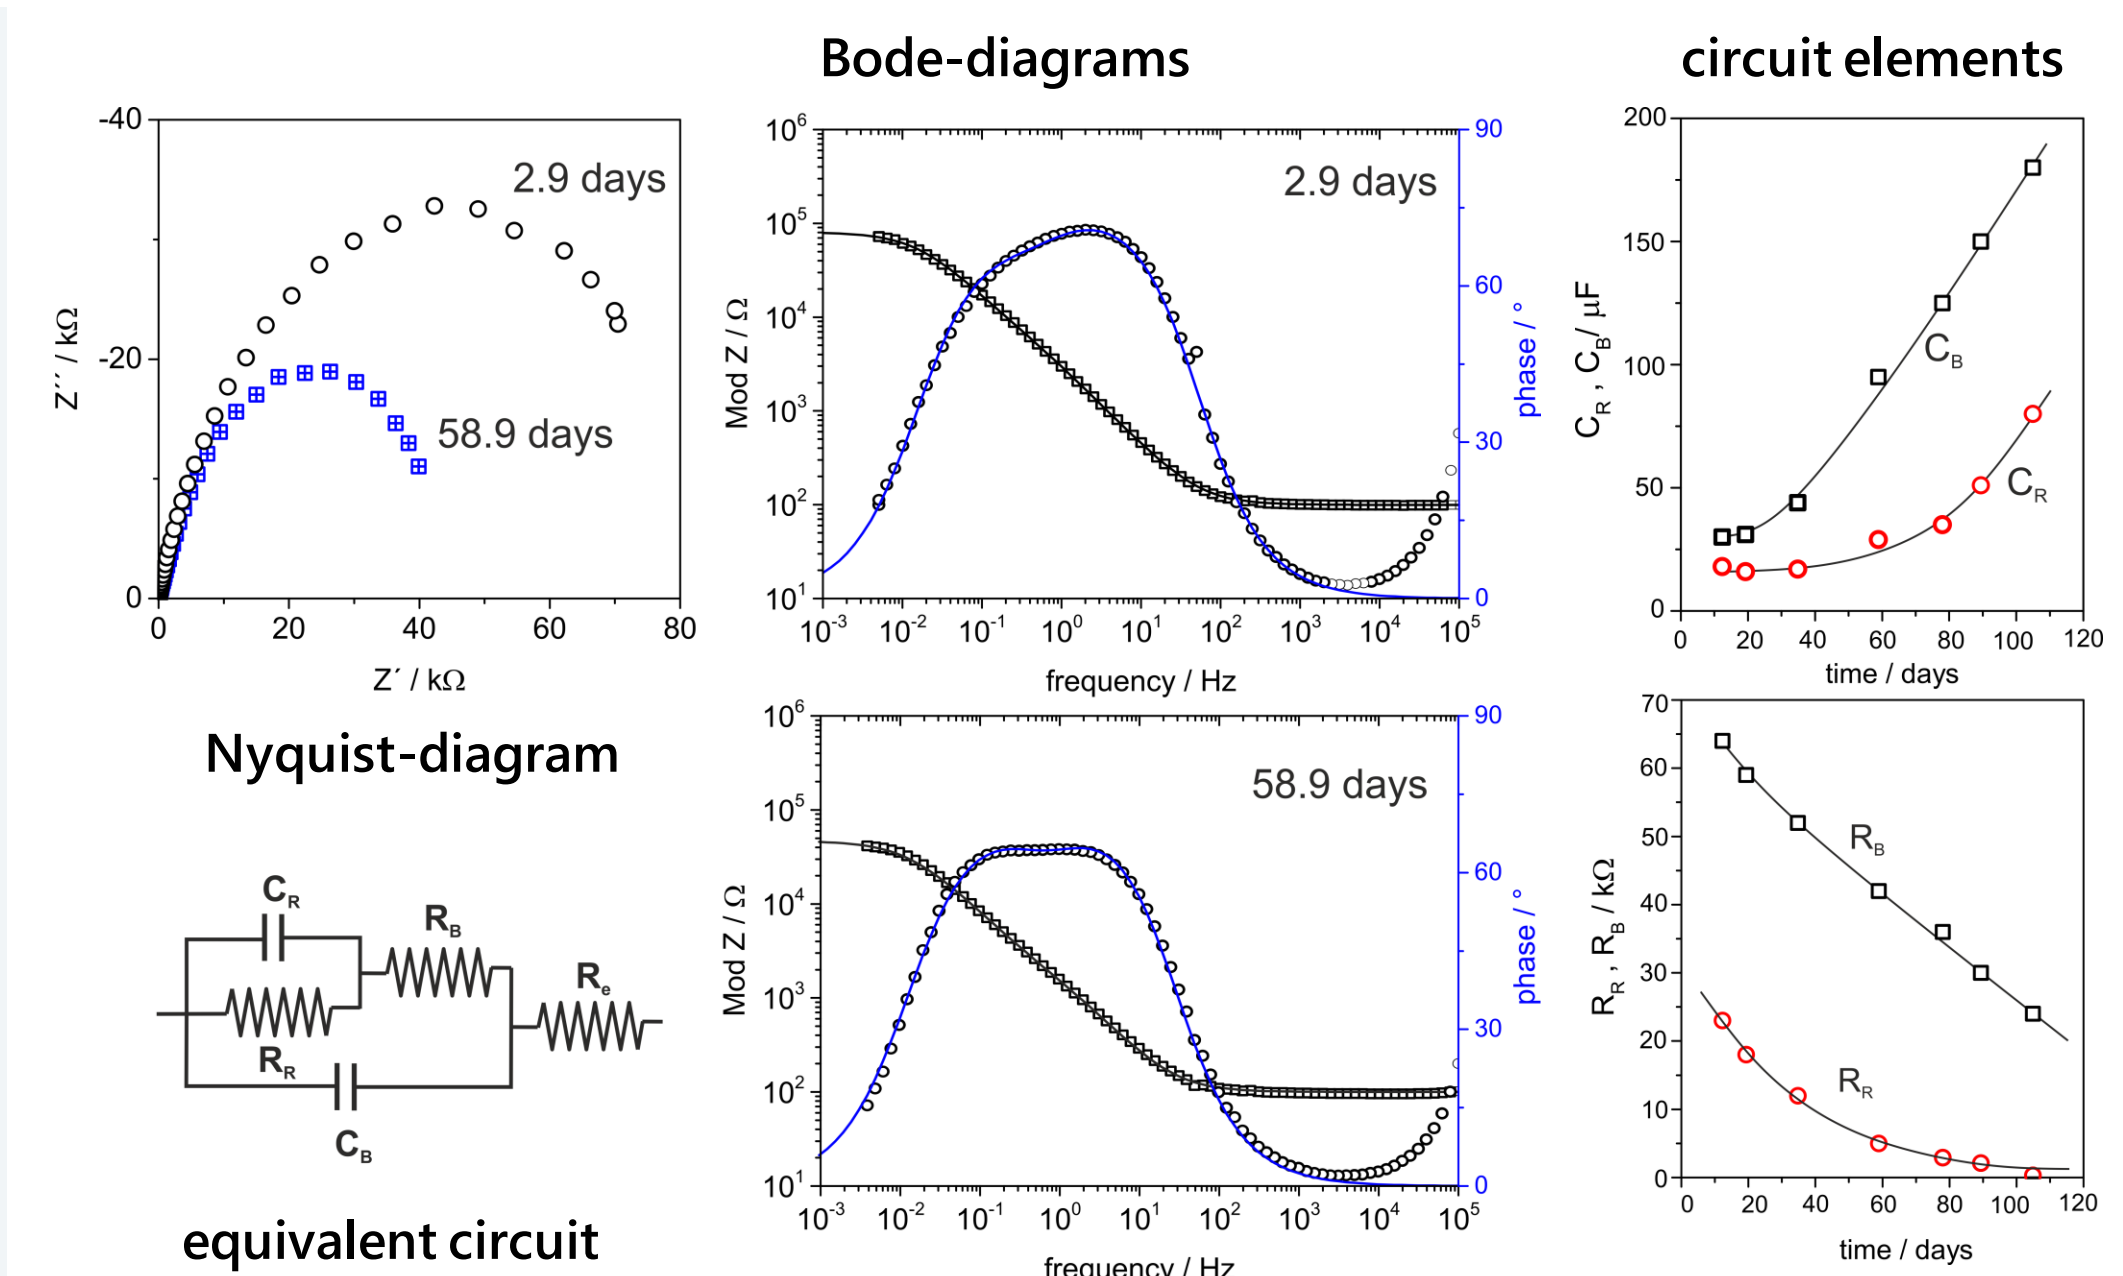

## Surface morphology and chemistry

### SEM - EDX

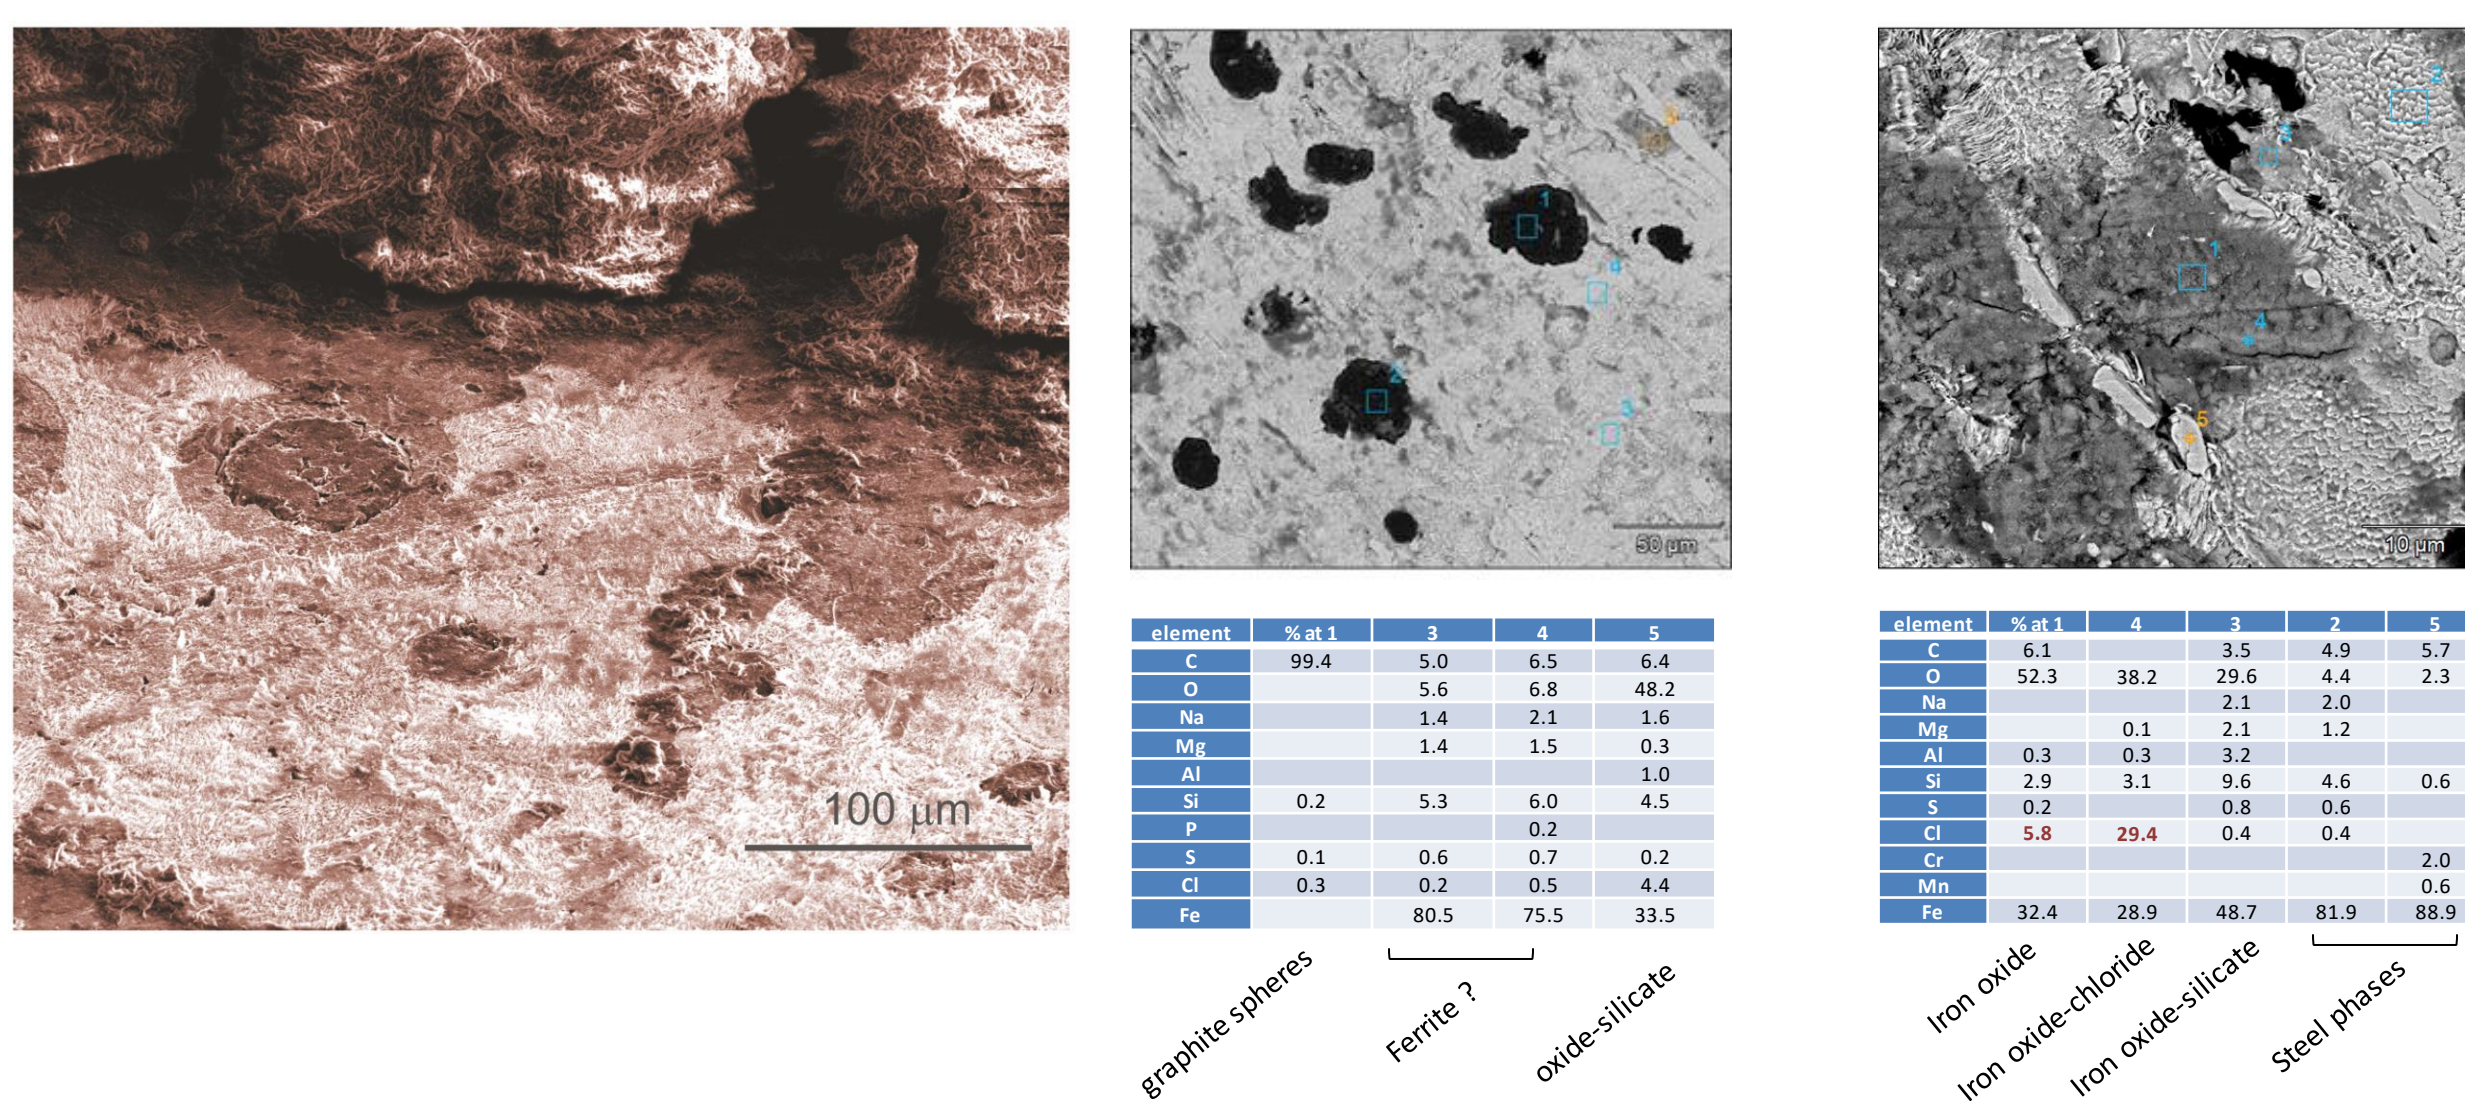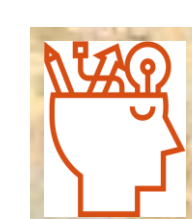

## Interpretations

The initial corrosion phase of GGG40 is characterized by the formation of local elements. Graphite nodules, specially reactive for the oxygen reduction, act as cathodic elements. They are coupled with the corroding matrix, accelerating the material degradation.

There is an accumulation of non-passivating corrosion products at the interface steel-bentonite. It consists of hydrated Fe(II)/Fe(III) oxy-hydroxides, silicates, and alkaline earth sulfates.

The formation of local elements accelerates the dissolution of ferrite around the graphite nodules which are exfoliated by hydrogen intercalation.

## Surface spectroscopy

### LOCAL XPS

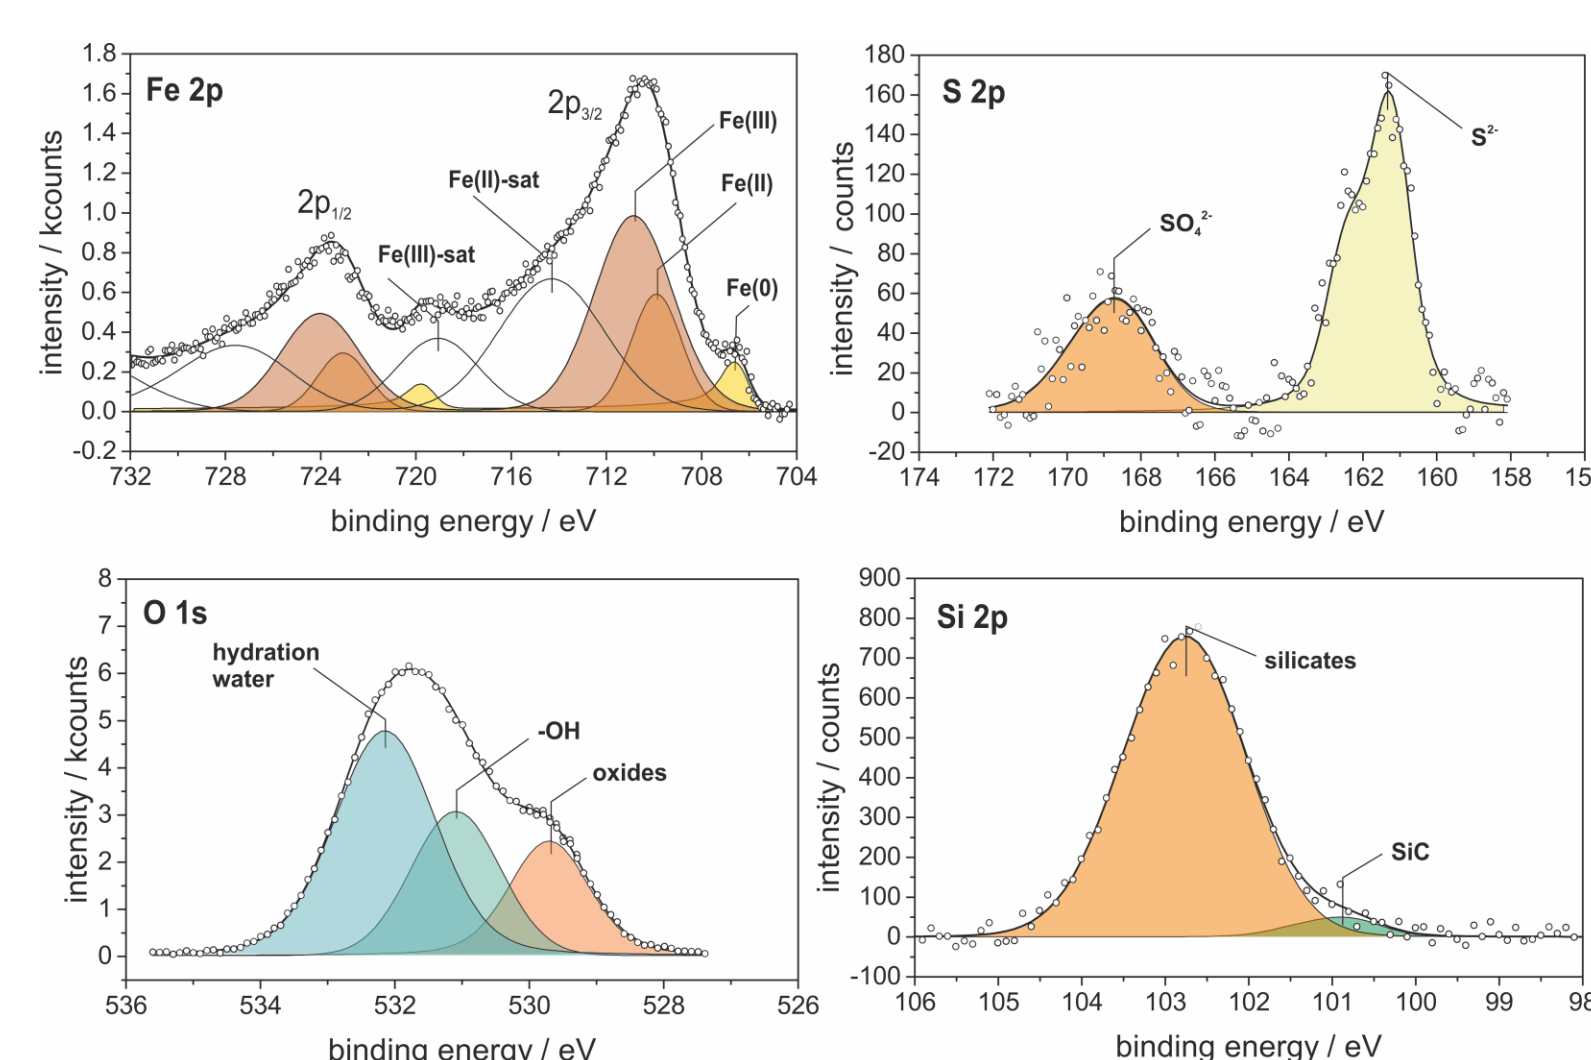

### TEM - EDX

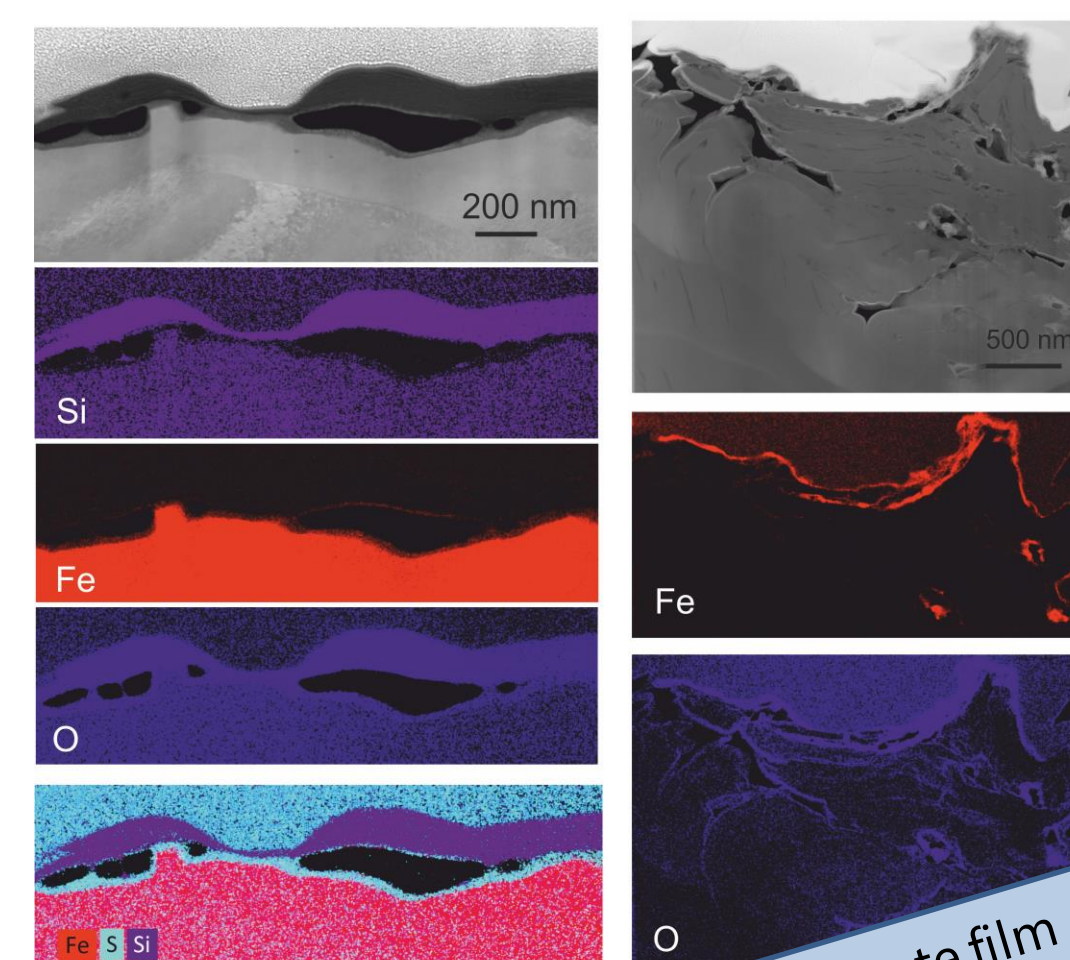

Deposition of an interfacial silicate film enclosing voids containing hydrogen.

## Mechanism

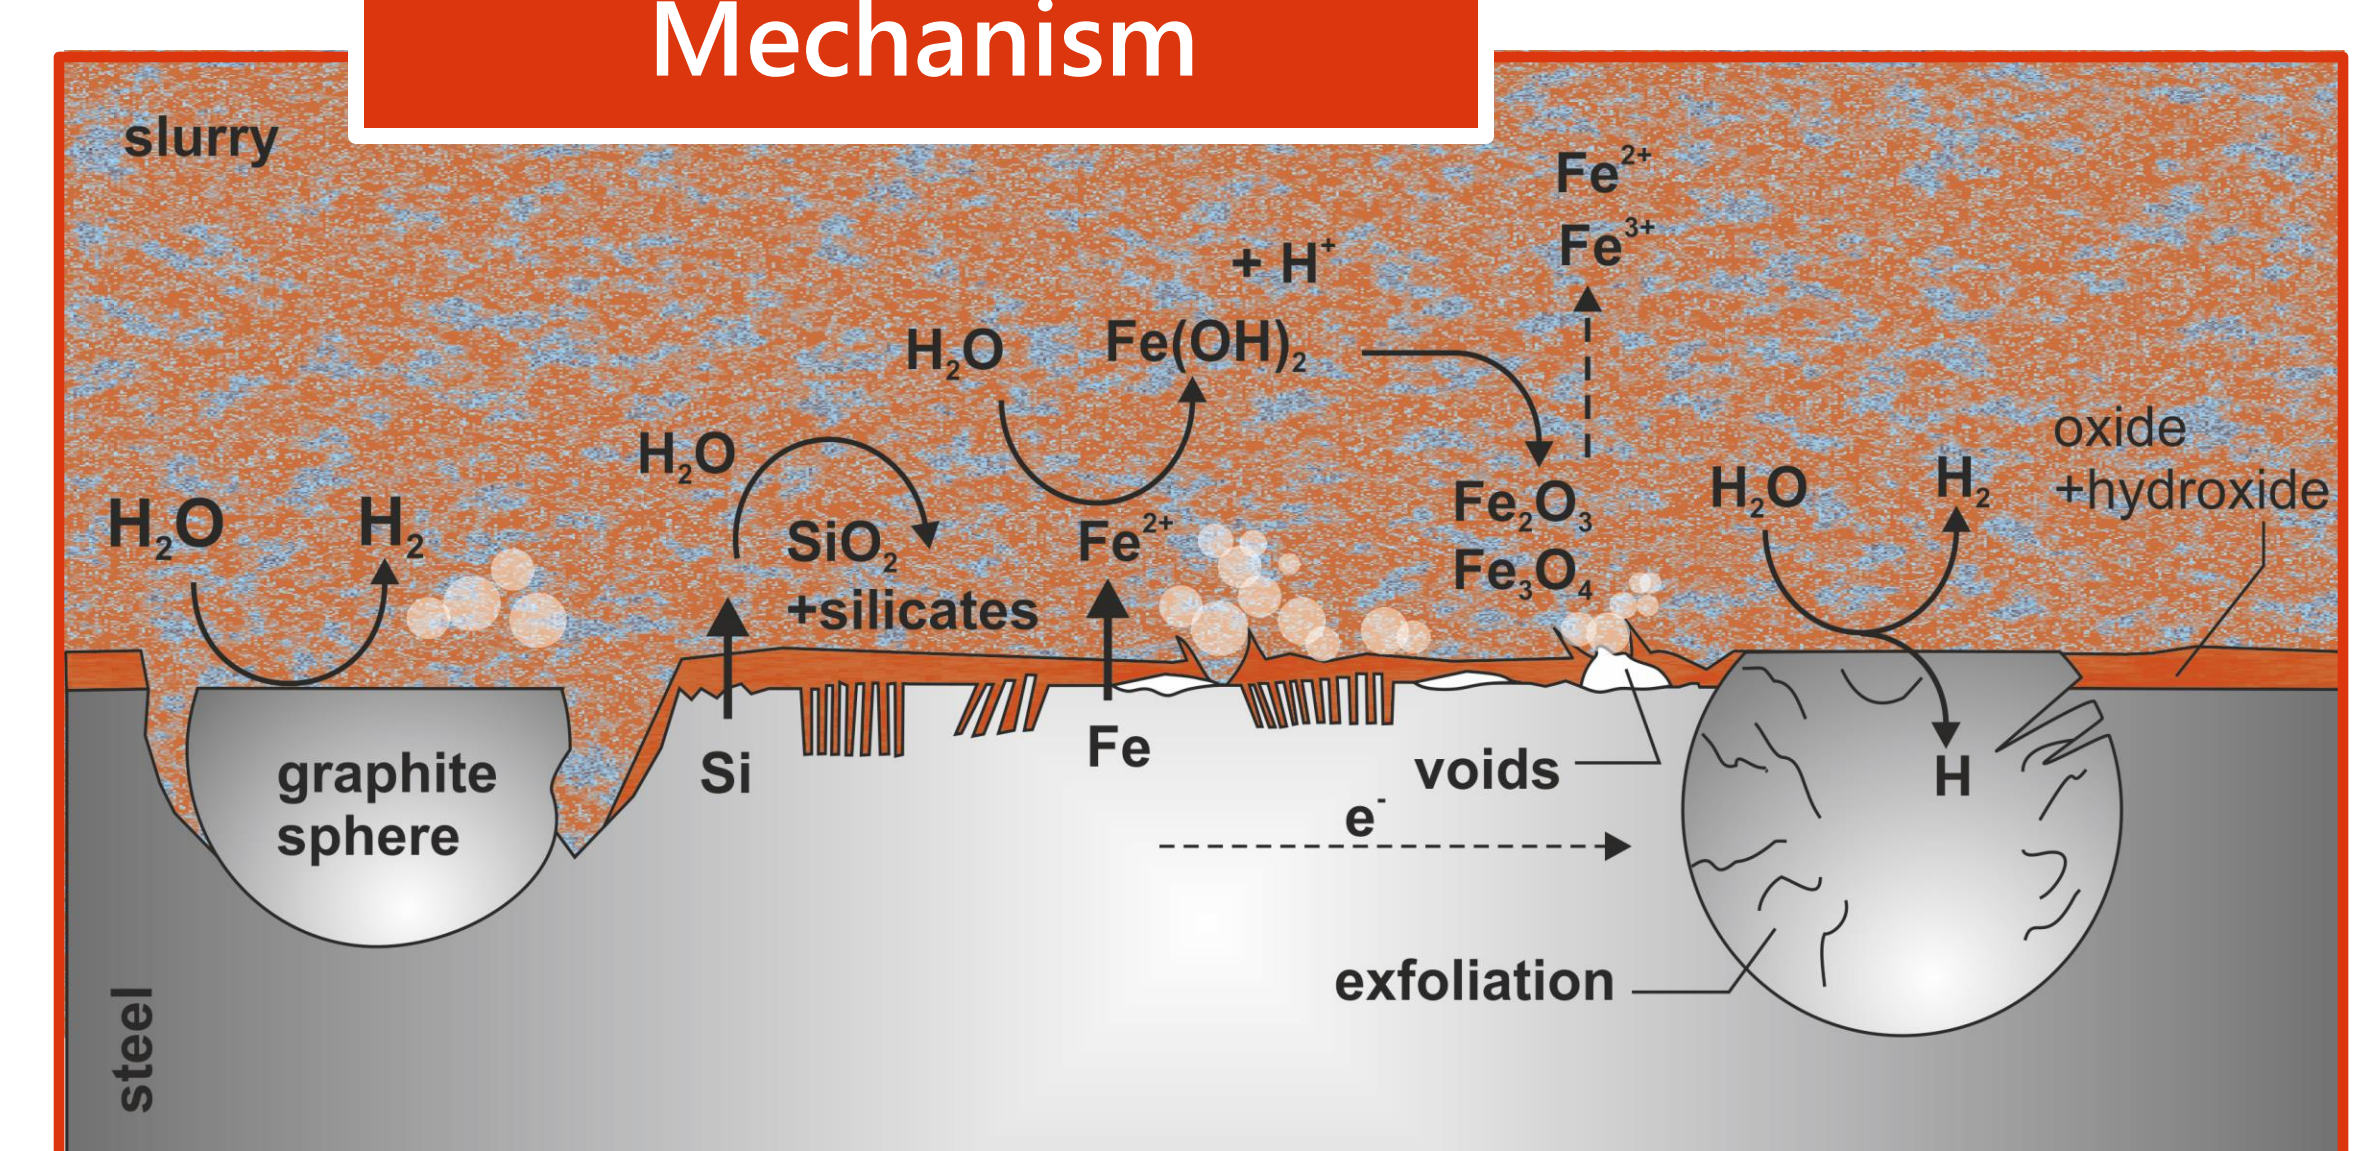

## Literature

- Hassel, T., Köhler, A., Kurt, Ö.S., ENTRIA-Arbeitsbericht-16, Institut für Werkstoffe, Leibniz-Universität Hannover, 2019, Hannover, Germany.
- Kadowaki, M. et al., J. Electrochem. Soc. 166, C345-C351, 2019.
- King, F., Padovani, C., Corros. Eng. Sci. Technol. 46, 82-90, 2011.
- Spence, Th.C., ASM Handbook, Vol. 13B: Corrosion:Materials, S.D. Cramer, B.S. Covino, Jr. (ed.), p.43-50, ASM, Materials Park, Ohio, 2005.
- Wang, B. et al., Metals, 12, 2103, 2022.
- Zhang, Y. et al., Mater. Res. Express 8, 026504, 2021.

## Contact

<sup>1</sup>Gesellschaft für Anlagen- und Reaktorsicherheit (GRS) gGmbH, Schwertnergasse 1, 50667 Köln, Andres.Munoz@grs.de

<sup>2</sup>Karlsruhe Institute of Technology, INE, 76344 Eggenstein-Leopoldshafen, Dieter.Schild@kit.edu

www.grs.de

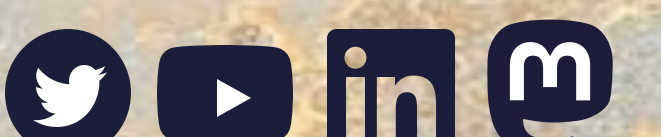

## Acknowledgements

We would like to thank the Federal Ministry for Environment, Nature Conservation, Nuclear Safety and Consumer Protection (BMUV) contract number 02 E 11981A) and the European Union's Horizon 2020 research programme (contract 847593) for financing our project
